# Supplementary material for: Surface modification of bioactive glasses for successful incorporation with poly(lactic-co-glycolic acid) (PLGA)
Source: Royal Society of Chemistry journal article supplement (doi:10.1039/d3lf00273j), 2024-01-01
Supplement: d3lf00273j1.pdf [file d3lf00273j1.pdf]

## Supplementary Information

### Surface modification of bioactive glasses for successful incorporation with poly (lactic-co-glycolic acid) (PLGA)

Nishant Jain<sup>a</sup>, Johannes Schmidt<sup>b</sup>, Oliver Görke<sup>a</sup>, David Karl<sup>a</sup>, Aleksander Gurlo<sup>a</sup>, Franziska Schmidt<sup>a,c,\*</sup>

<sup>a</sup> Chair of Advanced Ceramic Materials, Institute of Material Science and Technology, Faculty III Process Sciences, Technische Universität Berlin, Straße des 17. Juni 135, 10623 Berlin, Germany

<sup>b</sup> Department of Chemistry, Division of Functional Materials, Technische Universität Berlin, Hardenbergstr. 40, 10623 Berlin, Germany

<sup>c</sup> currently at: Department of Prosthodontics, Geriatric Dentistry and Craniomandibular Disorders, Charité-Universitätsmedizin Berlin, Corporate Member of Freie Universität Berlin, Humboldt-Universität zu Berlin, and Berlin Institute of Health, 14197 Berlin, Germany

\* Corresponding author: [franziska.schmidt2@charite.de](mailto:franziska.schmidt2@charite.de)

#### 1. EDX analysis

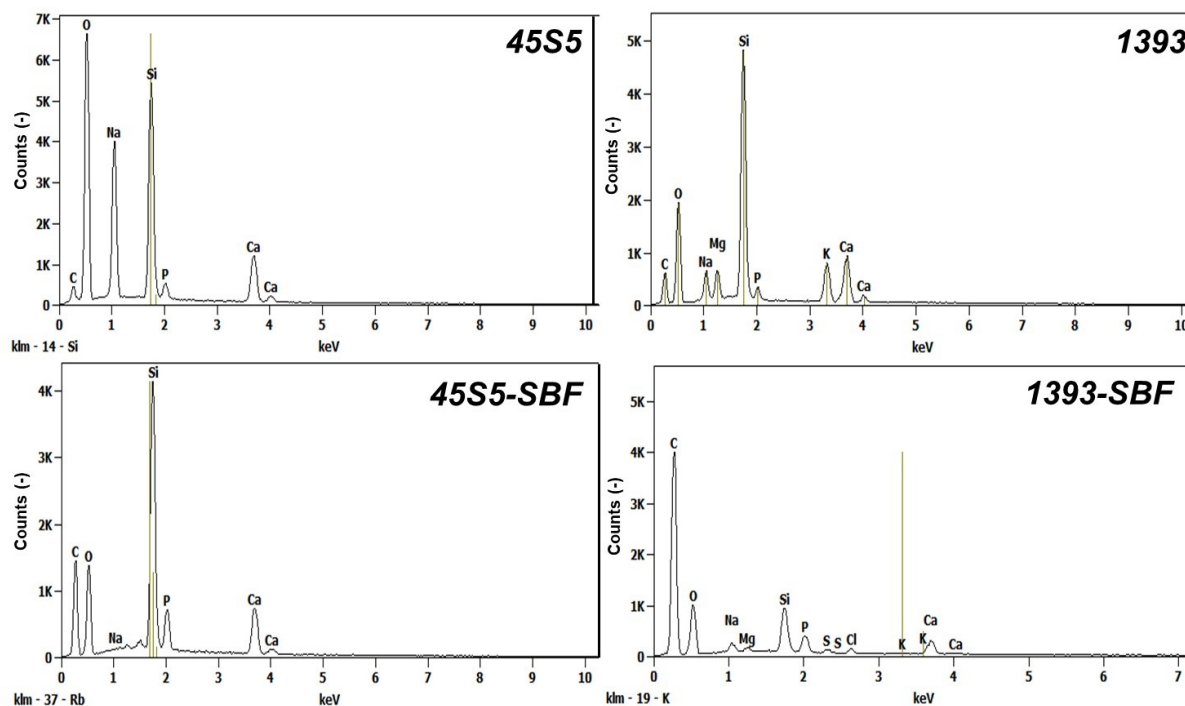

Figure S1. EDX 'point and shoot' spectra of as received and modified bioactive glasses

Table S1. Elemental composition of different BG in at%. Nominal composition was calculated from composition in mol% given by Maçon et al. <sup>21</sup>. EDX values were determined by six point measurements per sample and are given in mean value and standard deviation

| Bioactive glasses                      | Na            | Mg           | Si             | P             | K             | Ca            | Ca/P ratio |
|----------------------------------------|---------------|--------------|----------------|---------------|---------------|---------------|------------|
| Nominal composition 45S5 <sup>20</sup> | 35.4          | 0            | 33.6           | 1.6           | 0             | 29.4          | 18.38      |
| 45S5 (EDX)                             | 27.7±<br>6.9% | -            | 44.9±<br>3.7%  | 3.9±<br>0.5%  | -             | 23.6±<br>3.0% | 6.05       |
| 45S5-SBF (EDX)                         | 0.2±<br>0.3%  | -            | 74.5±<br>11.8% | 7.9±<br>3.6%  | -             | 17.4±<br>8.0% | 2.20       |
| Nominal composition 1393 <sup>20</sup> | 9.3           | 9.0          | 42.5           | 1.2           | 12.3          | 25.8          | 21.50      |
| 1393 (EDX)                             | 9.0±<br>1.7%  | 6.6±<br>0.8% | 49.6±<br>0.5%  | 3.0±<br>0.2%  | 12.4±<br>1.1% | 19.4±<br>1.9% | 6.47       |
| 1393-SBF (EDX)                         | 4.3±<br>2.3%  | 2.2±<br>0.4% | 52.7±<br>7.5%  | 13.7±<br>3.3% | 1.6±<br>2.0%  | 25.4±<br>3.8% | 1.85       |

## 2. XPS analysis survey scans

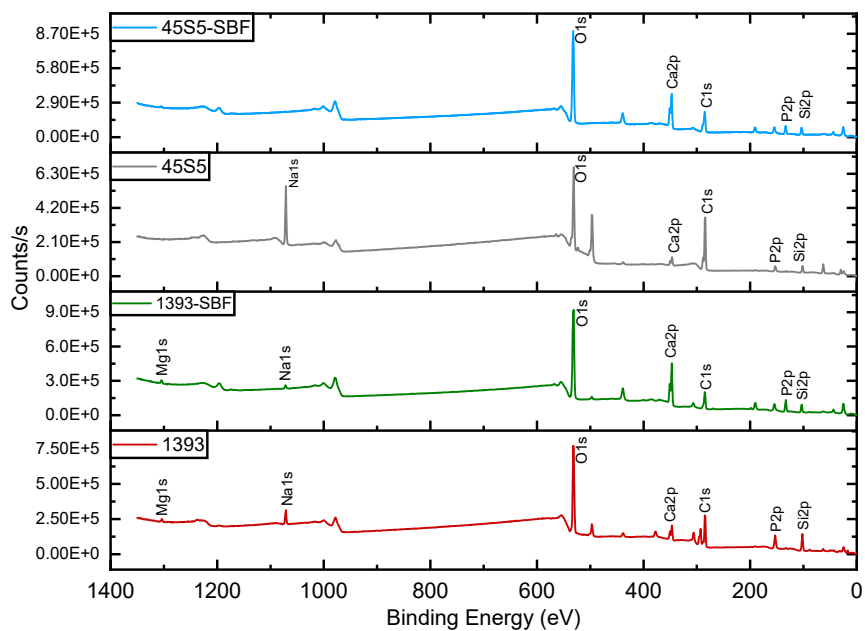

Figure S2: XPS survey scans of as received and surface treated bioactive glasses

### 3. Zeta Potential

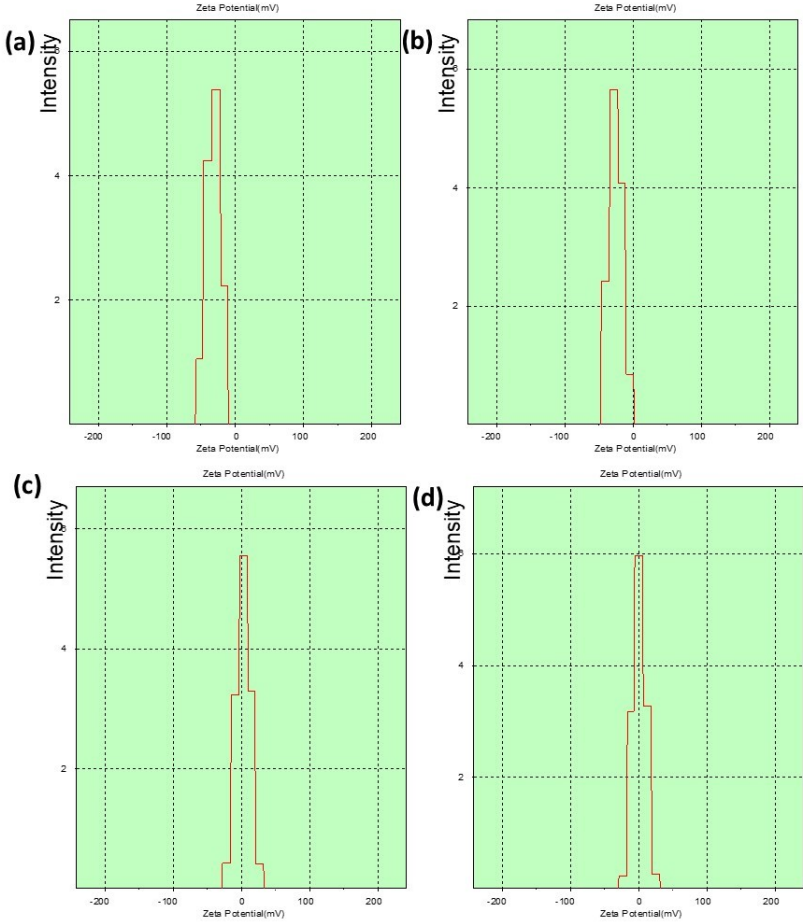

Figure S3: Zeta potential distribution of bioactive glasses (a) 45S5 (b) 1393 (c) 45S5-SBF (d)

1393-SBF

## 4. Particle Size Distribution

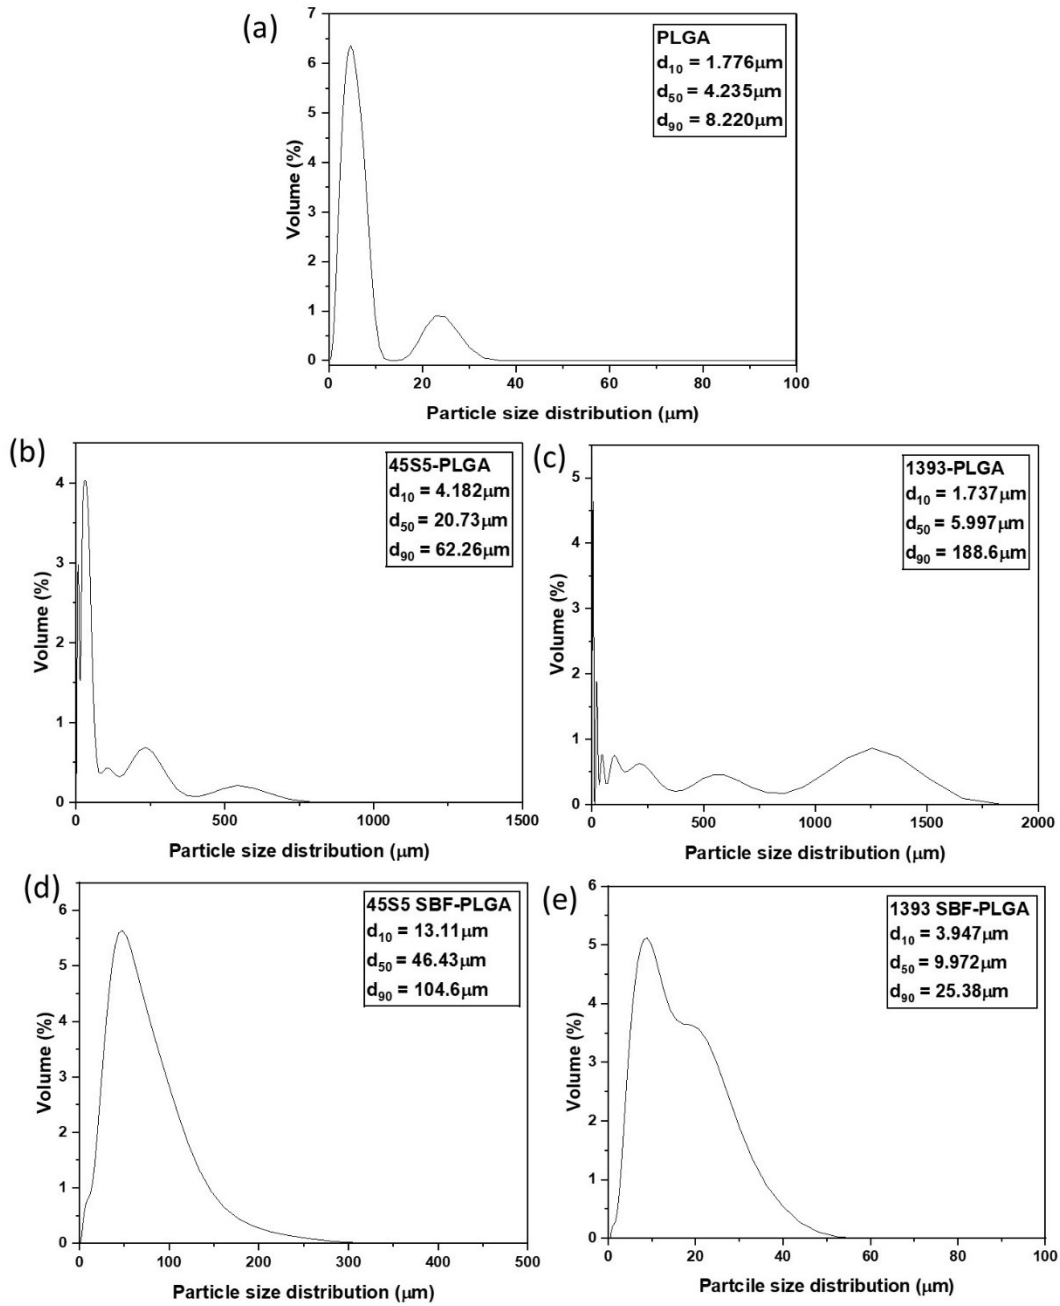

Figure S4: Particle size distribution of microspheres (a) PLGA (b) 45S5-PLGA (c) 1393-PLGA (d)

45S5 SBF-PLGA (e) 1393 SBF-PLGA
